# Supplementary material for: Combining Metabolic Analysis With Biological Endpoints Provides a View Into the Drought Resistance Mechanism of Carex breviculmis
Source: Front Plant Sci. 2022 Jul 7;13:945441. doi: 10.3389/fpls.2022.945441 (PMC9380063; doi:10.3389/fpls.2022.945441)
Supplement: Supplementary Table 1 — The details of 129 differential metabolites in Carex breviculmis under drought stress. [file Table_1.XLSX]

## Sheet: Supplementary table s1
Metabolites	Class	CK1	CK2	CK3	CK4	Mean CK	Drought1	Drought2	Drought3	Drought4	Mean Drought	Fold Change	p
"2,3,4,5-Tetrahydropiperidine-2-carboxylate"	Amino acids	0.00364689	0.00149689	0.00285575	0.00237307	0.00259315	0.0113315	0.0143649	0.0192762	0.00824022	0.0133032	5.13014	0.00421779
3-Hydroxylidocaine	Amino acids	0.00137825	0.00374841	0.00260469	0.0030347	0.00269151	0.0318147	0.0336222	0.0467867	0.00430373	0.0291318	10.8236	0.0253323
3-Hydroxymethylglutaric acid	Amino acids	0.00329216	0.0647973	0.0313391	0.0705992	0.0425069	0.133498	0.233556	0.163187	0.159363	0.172401	4.05583	0.00273007
Acetylhomoserine	Amino acids	0.0979778	0.109317	0.0826375	0.113473	0.100851	0.212903	0.29434	0.240299	0.295114	0.260664	2.58463	0.000311386
Allantoic acid	Amino acids	0.0504528	0.046318	0.102366	0.0116363	0.0526934	0.195908	0.147529	0.203041	0.071503	0.154495	2.93196	0.0288111
cis-Acetylacrylate	Amino acids	0.295008	0.308518	0.253246	0.340536	0.299327	0.377918	0.687725	0.615357	0.716908	0.599477	2.00275	0.00896146
D-Aspartic acid	Amino acids	1.00902	1.21348	1.29167	1.38598	1.22504	3.49518	4.02776	2.76405	3.82716	3.52854	2.88035	0.000207005
erythro-Isoleucine	Amino acids	0.729664	0.570702	1.87524	0.0168444	0.798112	2.76363	3.54108	1.79402	2.58006	2.6697	3.34502	0.0123417
gamma-Glutamylleucine	Amino acids	0.0012634	0.00266596	0.00080509	0.00366454	0.00209975	0.0294796	0.0224587	0.0158785	0.00614053	0.0184893	8.80548	0.0169813
Glutamylphenylalanine	Amino acids	0.00366514	0.00502182	0.00959716	0.00641059	0.00617368	0.0697796	0.101447	0.0946666	0.00851538	0.068602	11.112	0.0257524
L-Arginine	Amino acids	0.786998	2.87176	4.5791	1.84545	2.52083	7.58135	6.90925	13.4719	6.47468	8.6093	3.41527	0.015689
L-Methionine	Amino acids	0.0325016	0.0195564	0.036117	0.0438644	0.0330099	0.253737	0.0768476	0.15032	0.164905	0.161452	4.89103	0.0127557
L-Norleucine	Amino acids	1.32791	1.27187	1.25624	1.41014	1.31654	10.5683	4.30067	4.2596	6.09689	6.30636	4.79009	0.0151929
L-Phenylalanine	Amino acids	1.79079	1.43812	3.01008	1.96519	2.05105	7.3732	9.31023	8.9429	3.21038	7.20918	3.51488	0.011539
L-Proline	Amino acids	0.312796	0.323644	0.479173	0.377619	0.373308	13.4355	5.08758	5.08692	2.88427	6.62356	17.7429	0.0363893
L-Threonine	Amino acids	0.29061	0.283034	0.435368	0.382438	0.347863	1.62578	0.739354	1.12706	0.802569	1.07369	3.08654	0.0124685
N-a-Acetyl-L-arginine	Amino acids	0.0287346	0.0355003	0.00683233	0.0269584	0.0245064	0.0595806	0.0694961	0.0777572	0.0700779	0.0692279	2.82489	0.00080942
N-Acetylvaline	Amino acids	0.0297055	0.0172571	0.0281491	0.0115848	0.0216741	0.07199	0.0672697	0.071408	0.025095	0.0589407	2.7194	0.0219448
N-Carboxyacetyl-D-phenylalanine	Amino acids	0.0612668	0.0688258	0.0520774	0.0771266	0.0648241	0.202543	0.180767	0.170989	0.064904	0.154801	2.38801	0.0277286
N-Hydroxy-L-tyrosine	Amino acids	0.0050692	0.00733722	0.00484515	0.0212303	0.00962046	0.121605	0.0598333	0.0651345	0.0225532	0.0672816	6.99359	0.032371
Pipecolic acid	Amino acids	2.24999e-05	0.00111798	0.00135532	2.26613e-05	0.000629613	0.0320352	0.0221391	0.0168644	0.0182887	0.0223318	35.4691	0.000739128
Pyroglutamic acid	Amino acids	0.320479	0.275499	0.318922	0.376256	0.322789	0.88792	1.26533	0.543895	0.73468	0.857956	2.65795	0.0133399
Pyrroline hydroxycarboxylic acid	Amino acids	0.26154	0.272281	0.320563	0.403846	0.314557	2.79239	0.921449	0.766564	1.53211	1.50313	4.77854	0.0420466
Racemethionine	Amino acids	0.0769977	0.0475158	0.100235	0.0762689	0.0752543	0.430887	0.221577	0.357925	0.546103	0.389123	5.17078	0.00384718
Tryptophan	Amino acids	1.55782	2.13057	3.02761	2.18468	2.22517	9.27101	4.52283	6.81886	3.34929	5.9905	2.69215	0.0311039
Valyl-Isoleucine	Amino acids	0.00930603	0.00445695	0.00497697	0.00851028	0.00681256	0.0184095	0.00861629	0.0315616	0.035904	0.0236229	3.46754	0.0382187
"2,3-Dihydro-2,3-dihydroxy-9-phenyl-1H-phenalen-1-one"	Benzenoids	0.00444196	0.00775574	0.00596309	0.00569873	0.00596488	0.0364006	0.0162001	0.0100885	0.0318399	0.0236323	3.9619	0.0307917
"5-Heneicosyl-1,3-benzenediol"	Benzenoids	0.336666	0.224933	0.194679	0.313488	0.267441	1.67247e-05	0.087256	0.0914544	0.207535	0.0965655	0.361072	0.020322
"Dimethyl (1R*,2S*,3S*)-2-carboxy-3-(3,4-dihydroxyphenyl)-2,3-dihydro-5,6-dihydroxy-1H-indene-1-acetate"	Benzenoids	0.00622882	0.00598921	0.0265457	0.00746693	0.0115577	0.057157	0.0419214	0.040849	0.0298734	0.0424502	3.67291	0.00628907
[10]-Paradol	Benzenoids	0.026468	0.0263294	0.0175282	0.0450952	0.0288552	0.0811696	0.0611671	0.0816009	0.0320432	0.0639952	2.2178	0.035744
3-Phenoxybenzoic acid	Benzenoids	0.0138338	0.0109258	0.00952937	0.000589201	0.00871953	0.0193008	0.0336356	0.0299173	0.0107353	0.0233972	2.68332	0.0481663
Avenalumic acid	Benzenoids	0.00891148	0.00304742	0.00857363	0.0112137	0.00793655	0.0571848	0.0387014	0.0253702	0.0243737	0.0364075	4.58733	0.0110101
Batatasin I	Benzenoids	0.00571806	0.00872813	0.00409992	0.00799371	0.00663496	0.0212967	0.00975925	0.0097381	0.0233514	0.0160364	2.41695	0.0484094
Benzaldehyde	Benzenoids	0.0269009	0.0239698	0.0444733	0.0422281	0.034393	0.0621459	0.105054	0.095662	0.0523586	0.0788052	2.29131	0.018058
Hovenolactone	Benzenoids	0.00399497	0.00801279	0.00164664	0.00986738	0.00588044	0.0621791	0.0587088	0.0274879	0.013352	0.040432	6.87566	0.0287518
Isobutyl N-methylanthranilate	Benzenoids	0.0453413	0.0322356	0.0144397	0.0329971	0.0312534	0.0128484	0.00998465	0.0224293	0.00772886	0.0132478	0.423882	0.0450497
Monoethyl phthalate	Benzenoids	0.142035	0.0748967	0.0936494	0.190547	0.125282	0.0500533	0.066103	0.0464858	0.0560339	0.054669	0.436367	0.0362987
Tyrosol	Benzenoids	0.0147926	0.0109562	0.00704686	0.0137798	0.0116439	0.0238579	0.0379543	0.0193072	0.0159176	0.0242592	2.08344	0.0497231
"(3beta,22R,23R,24S)-3,22,23-Trihydroxystigmastan-6-one"	Lipids	0.125344	0.0774498	0.0431704	0.0655893	0.0778883	0.173055	0.263105	0.146594	0.125733	0.177122	2.27405	0.0293433
"(3beta,5beta,8beta,22E,24xi)-Ergosta-6,22-diene-3,5,8-triol"	Lipids	0.419951	0.5221	0.272364	0.326603	0.385255	0.00397683	0.00663073	0.0437541	0.00669077	0.0152631	0.0396182	0.00056082
"(9S,10S)-10-hydroxy-9-(phosphonooxy)octadecanoate"	Lipids	0.013104	0.00824102	0.0109301	0.00843541	0.0101776	0.00335133	0.00979844	0.00318082	0.00341362	0.00493605	0.484991	0.0387773
"1-(9Z,12Z,15Z-octadecatrienoyl)-glycero-3-phosphate"	Lipids	0.0286374	0.0131294	0.0241707	0.0203642	0.0215754	0.0304987	0.0525911	0.0629918	0.054691	0.0501932	2.3264	0.00975777
"Methyl (Z,Z)-10-hydroxy-2,8-decadiene-4,6-diynoate"	Lipids	0.00330012	0.00443718	1.69667e-05	0.00385687	0.00290278	0.0240778	0.00781439	0.0154219	0.00655832	0.0134681	4.63972	0.0441603
2-Isopropylmalic acid	Lipids	0.000313967	0.00417965	0.000460223	0.00237834	0.00183304	0.0260925	0.0441496	0.0265671	0.00362692	0.025109	13.698	0.0317109
3alpha-Acetomethoxy-11alpha-oxo-12-ursen-24-oic acid	Lipids	0.00312472	0.0048617	0.00203067	0.00810517	0.00453056	0.0422367	0.0532543	0.0272643	0.00378872	0.031636	6.9828	0.0456811
Alpha-Linolenic acid	Lipids	6.69665	7.26095	14.8114	9.08855	9.46438	16.4211	16.5013	27.8756	15.6756	19.1184	2.02004	0.0316729
alpha-Tocopherolquinone	Lipids	0.154893	0.627842	0.353383	0.41897	0.388772	0.00270351	0.106948	0.0739566	0.116534	0.0750354	0.193006	0.0208051
Arachidic acid	Lipids	1.22507	0.659682	0.721829	1.91289	1.12987	0.0952199	0.321396	0.359246	0.274857	0.26268	0.232487	0.026266
Barringtogenol C	Lipids	0.00890017	0.0297324	0.0142846	0.0343883	0.0218264	0.0614519	0.0907666	0.0582967	0.0295793	0.0600236	2.75005	0.0334521
Behenic acid	Lipids	0.228918	0.343614	0.296467	0.624012	0.373253	0.140462	0.257504	0.0969656	1.92361e-05	0.123738	0.331512	0.0499371
Butyrylcarnitine	Lipids	0.00481224	0.00495804	0.000507422	0.00520888	0.00387165	0.0553236	0.0440437	0.0269315	0.00957395	0.0339682	8.77358	0.0243785
DG(15:0/20:5/0:0)	Lipids	0.0177418	0.0126906	0.0149069	0.0192131	0.0161381	0.0245427	0.0289259	0.0630738	0.0470247	0.0408918	2.53386	0.0328726
DG(18:2/18:4/0:0)	Lipids	0.0200315	0.0860501	0.0608294	0.110183	0.0692736	0.154486	0.135113	0.220224	0.279513	0.197334	2.84862	0.0152377
DG(18:3/18:4/0:0)	Lipids	0.207752	0.179013	0.100712	0.260807	0.187071	0.545094	0.378676	0.807547	0.602667	0.583496	3.11912	0.00574453
DG(18:4/18:4/0:0)	Lipids	0.215907	0.257991	0.177729	0.420577	0.268051	0.530709	0.531629	0.539425	0.564161	0.541481	2.02007	0.00229975
Ganoderiol D	Lipids	0.0373275	0.112196	0.0567299	0.111557	0.0794525	0.302951	0.219864	0.214146	0.200782	0.234436	2.95064	0.00210399
Lycopersiconol	Lipids	0.180453	0.182917	0.126204	0.246025	0.183899	0.2836	0.314814	0.677378	0.480334	0.439032	2.38734	0.0344812
LysoPA(16:0/0:0)	Lipids	0.038593	0.0259076	0.0321697	0.0384363	0.0337766	0.0921298	0.125832	0.0547177	0.0820991	0.0886948	2.62592	0.0105502
LysoPC(16:0)	Lipids	0.761706	0.615493	0.418116	0.58019	0.593876	2.50563	5.79767	4.43429	2.40957	3.78679	6.3764	0.00802325
LysoPC(18:2)	Lipids	0.184652	0.124809	0.136289	0.155367	0.150279	0.574018	0.183997	0.633885	0.483338	0.468809	3.11959	0.0194912
LysoPC(18:3)	Lipids	0.0205826	0.0199157	0.0120272	0.0158662	0.0170979	0.0348825	0.0977949	0.0936595	0.0795908	0.0764819	4.47317	0.00647073
LysoPE(0:0/18:3)	Lipids	0.0051015	0.00823536	0.00467621	0.00597426	0.00599683	0.00729858	0.0225012	0.02391	0.0189878	0.0181744	3.03066	0.0195457
LysoPE(16:0/0:0)	Lipids	0.182833	0.143366	0.098807	0.122106	0.136778	0.592949	1.309	0.570296	0.398314	0.717639	5.24675	0.0285583
LysoPE(18:2/0:0)	Lipids	0.0669029	0.0342432	0.0419059	0.0454399	0.0471229	0.0779841	0.196035	0.123602	0.135608	0.133307	2.82892	0.0143843
LysoPE(18:3/0:0)	Lipids	0.0411329	0.0241498	0.0277247	0.0548607	0.0369671	0.0860655	0.178198	0.155653	0.085229	0.126286	3.41619	0.0115698
MG(0:0/18:4/0:0)	Lipids	0.00724629	0.0100402	0.00234481	0.01595	0.00889534	0.0278144	0.0267976	0.0406522	0.0208213	0.0290214	3.26254	0.00721714
MG(16:0/0:0/0:0)	Lipids	0.00509799	0.00600491	0.00553365	0.007238	0.00596864	0.0232936	0.033463	0.0138004	0.0152903	0.0214618	3.59577	0.014199
PC(14:1/22:6)	Lipids	2.24999e-05	0.00492458	1.69667e-05	0.00268999	0.00191351	0.039269	0.0215694	0.036484	0.00506901	0.0255978	13.3774	0.0247562
PC(20:4/18:4)	Lipids	0.0124768	0.0201446	0.0180021	0.0637863	0.0286025	0.18118	0.158364	0.28472	0.0737548	0.174505	6.10104	0.0176142
Tsugaric acid B	Lipids	0.00665662	0.00551823	0.0114956	0.0110652	0.00868392	0.0380917	0.035725	0.0225618	0.0119708	0.0270873	3.11925	0.0261801
Adenine	Nuleotides	0.172479	0.13014	0.234803	0.255213	0.198159	0.340141	0.46739	0.439876	0.532164	0.444893	2.24513	0.00240725
Adenosine	Nuleotides	0.0174035	0.0156069	0.0247037	0.0198524	0.0193916	0.0420744	0.0453911	0.0458722	0.0612605	0.0486495	2.50879	0.000812151
Dihydrouracil	Nuleotides	0.136853	0.134687	0.197527	0.16874	0.159452	0.495252	0.44122	0.496108	0.821516	0.563524	3.53413	0.00376852
4-Pyridoxic acid	Organic acid	0.0193387	0.0182548	0.0261649	0.0387095	0.025617	0.0504801	0.101807	0.0823553	0.0575906	0.0730583	2.85195	0.00958322
Humulinic acid A	Organic acid	2.24999e-05	0.00278183	0.000628825	0.00455287	0.0019965	0.0535152	0.0261061	0.0312895	0.00422952	0.0287851	14.4178	0.0388346
L-Malic acid	Organic acid	0.222535	0.250113	0.147955	0.336882	0.239371	0.493851	0.923026	0.619115	0.437413	0.618351	2.58323	0.0166355
Oxoglutaric acid	Organic acid	0.0706693	0.0196866	0.0471768	0.112443	0.062494	0.00848102	0.0142611	0.0126086	0.0175014	0.013213	0.211429	0.0466659
Quinaldic acid	Organic acid	2.24999e-05	0.00236747	1.69667e-05	0.00668966	0.00227415	0.0199495	0.012158	0.0144158	0.00937676	0.013975	6.14517	0.00524891
Succinic acid	Organic acid	1.6582	1.90477	1.34212	1.64831	1.63835	6.23856	9.91438	5.44399	5.58584	6.79569	4.14789	0.00280916
"2'-Hydroxy-4',6'-dimethoxy-3'-methylacetophenone"	Other	0.0849661	0.0675643	0.10294	0.0893779	0.0862121	0.188136	0.225356	0.219654	0.0867398	0.179972	2.08754	0.029371
"2-Hydroxy-4,7-dimethoxy-2H-1,4-benzoxazin-3(4H)-one"	Other	0.000276206	0.0018292	0.000211926	0.000949551	0.000816721	0.00457264	0.0135667	0.00524033	0.00406668	0.0068616	8.4014	0.0379196
"3-Hydroxyadipic acid 3,6-lactone"	Other	1.69547	1.98408	1.4022	1.86943	1.73779	3.08607	5.0395	4.66636	4.66707	4.36475	2.51166	0.00115557
"6-Chloro-N-(1-methylethyl)-1,3,5-triazine-2,4-diamine"	Other	1.5803	2.07641	2.96226	2.33528	2.23856	9.49136	4.88694	7.06804	3.31204	6.18959	2.76499	0.0281943
(-)-1-(Methylthio)propyl 1-propenyl disulfide	Other	0.0737667	0.0966531	0.0428083	0.0690153	0.0705608	0.017928	0.0262599	0.0229423	0.0439575	0.0277719	0.393588	0.0136685
1-Pyrroline	Other	0.00640622	0.00724437	0.0219994	0.0117855	0.0118589	0.0168497	0.0261999	0.0374465	0.0288226	0.0273297	2.30458	0.0316671
5-Hydroxymethyl-2-furancarboxaldehyde	Other	0.0607072	0.386983	0.227968	0.180529	0.214047	1.14333	1.48623	1.17121	1.2376	1.25959	5.88466	5.39022e-05
5-Methyl-2(3H)-furanone	Other	0.325317	0.410612	0.296081	0.0434189	0.268857	0.538913	0.875283	0.871434	0.870548	0.789045	2.93481	0.00397779
6-Methylquinoline	Other	0.0630347	0.084492	0.117552	0.0793813	0.086115	0.368194	0.189304	0.276663	0.13398	0.242035	2.81061	0.0250557
Buccoxime	Other	0.0317454	0.0454233	0.0405649	0.0570984	0.043708	0.308762	0.243144	0.175595	0.0666097	0.198528	4.54214	0.0246606
Coproporphyrin III	Other	2.24999e-05	0.00171377	1.69667e-05	0.00472697	0.00162005	0.00803794	0.00888647	0.00860696	0.00360782	0.0072848	4.49665	0.0143812
Dulxanthone E	Other	0.00590614	0.00459477	0.00830271	0.00526413	0.00601694	0.0223581	0.0177426	0.0110333	0.017646	0.017195	2.85776	0.00396051
Ethenyl acetate	Other	0.0717153	0.0788687	0.064316	0.0834693	0.0745923	0.0772521	0.247789	0.202593	0.278213	0.201462	2.70084	0.0289471
Eugenitol	Other	0.026468	0.00553092	0.0156199	0.0195891	0.016802	0.0382936	0.0312978	0.0322914	0.0349034	0.0341965	2.03527	0.00957145
Myrtine	Other	0.011709	0.0517001	0.0253228	0.0876305	0.0440906	0.769081	0.712235	0.480648	0.106726	0.517172	11.7298	0.0204024
N1-(2-Hydroxyethyl)flurazepam	Other	0.00796507	0.0169165	0.0195083	0.0107457	0.0137839	0.0753121	0.0982675	0.0511793	0.0440211	0.067195	4.87489	0.00548252
Phlorin	Other	0.443646	0.514415	0.35993	0.481532	0.449881	0.95486	1.46237	1.34498	1.28191	1.26103	2.80303	0.000381485
Pterolactam	Other	0.0369992	0.0368061	0.0446683	0.0757533	0.0485568	0.567122	0.291904	0.171206	0.186141	0.304093	6.26264	0.0323104
Pyrrolidine	Other	0.047911	0.0410693	0.0850235	0.0595562	0.05839	0.256361	0.150159	0.194132	0.140583	0.185309	3.17364	0.00403932
Quinoline	Other	0.0193966	0.022335	0.0332548	0.0223284	0.0243287	0.097849	0.0838299	0.0710342	0.0367722	0.0723713	2.97473	0.0116478
Quinone	Other	0.352282	0.415267	0.284314	0.384298	0.35904	0.620217	1.05683	0.956437	0.986563	0.905011	2.52064	0.00167121
Thermophillin	Other	1.47309	1.10856	0.646545	1.12508	1.08832	0.264265	0.358118	0.510595	0.3768	0.377445	0.346814	0.00698612
"(7'R*,8'S*)-Methyl 4,7'-epoxy-3,8'-bilign-7-ene-4',9'-dihydroxy-3',5-dimethoxy-9-oate"	Phenylpropanoids and polyketides	0.00492052	0.00394893	0.00462148	0.00660808	0.00502475	0.0192884	0.0153366	0.00764571	0.0145101	0.0141952	2.82505	0.0101969
"2'-Hydroxy-4,4',6'-trimethoxychalcone"	Phenylpropanoids and polyketides	0.0285429	0.0276521	0.0216281	0.0347393	0.0281406	0.101209	0.0469864	0.0435204	0.0808549	0.0681426	2.4215	0.0299017
"3,4-Dicaffeoyl-1,5-quinolactone"	Phenylpropanoids and polyketides	0.00811623	0.0160211	0.0243741	0.00545029	0.0134904	0.0300669	0.0406842	0.0524688	0.0192291	0.0356123	2.63982	0.037319
3 Hydroxycoumarin	Phenylpropanoids and polyketides	0.0201054	0.0422825	0.14851	0.0332287	0.0610317	0.196062	0.214801	0.235067	0.130378	0.194077	3.17994	0.0117184
5-Methoxyseselin	Phenylpropanoids and polyketides	2.24999e-05	0.000304401	0.00215219	0.00482282	0.00182548	0.0186049	0.0185331	0.0245499	0.00646474	0.0170382	9.33354	0.00848121
Artemetin	Phenylpropanoids and polyketides	0.0140681	0.0137099	0.0681168	0.0204475	0.0290856	0.124278	0.121662	0.152974	0.111476	0.127597	4.38697	0.000797824
Artemidiol	Phenylpropanoids and polyketides	2.24999e-05	0.000483984	0.00468777	0.00195456	0.0017872	0.0284903	0.0103359	0.0165033	0.00736617	0.0156739	8.77007	0.0274386
Crosatoside A	Phenylpropanoids and polyketides	0.0168607	0.013166	0.0165061	0.0201282	0.0166652	0.0563261	0.0321769	0.0540101	0.0191845	0.0404244	2.42567	0.039169
Cyclocurcumin	Phenylpropanoids and polyketides	0.0102655	0.00811194	0.0136734	0.0173752	0.0123565	0.032756	0.0358847	0.0246007	0.0376785	0.03273	2.64881	0.00118754
Glyurallin A	Phenylpropanoids and polyketides	0.0125506	0.0118209	0.0076647	0.0105972	0.0106584	0.030287	0.0190819	0.0160417	0.0324284	0.0244597	2.29489	0.0166088
Isomucronulatol	Phenylpropanoids and polyketides	0.00579554	0.00547049	0.00398174	0.00653257	0.00544508	0.0156344	0.0119156	0.00997	0.0135063	0.0127566	2.34277	0.00143502
Methyl trans-p-methoxycinnamate	Phenylpropanoids and polyketides	0.000293967	0.000196785	1.69667e-05	0.00168504	0.000548189	0.0123151	0.00527405	0.0115255	0.0182597	0.0118436	21.6049	0.00562768
Naringin 6''-rhamnoside	Phenylpropanoids and polyketides	0.00504141	0.00242286	0.0081847	0.003232	0.00472024	0.0168427	0.0141478	0.00936262	0.0128432	0.0132991	2.81746	0.0052993
Resveratrol	Phenylpropanoids and polyketides	0.0115476	0.00334594	0.00307381	0.00739898	0.00634157	0.0448874	0.0402544	0.0253569	0.0195753	0.0325185	5.12783	0.0060718
Yuccaol C	Phenylpropanoids and polyketides	0.0996522	0.0942496	0.0737262	0.0640466	0.0829187	0.168162	0.306465	0.170207	0.175288	0.205031	2.47267	0.012803
D-Maltose	Sugars	0.425802	0.518844	0.328763	0.41185	0.421315	0.866732	1.48092	1.26178	1.29615	1.22639	2.91088	0.000992809
D-Tagatose	Sugars	0.556581	0.662477	0.449088	0.575992	0.561034	1.05844	1.68206	1.58486	1.55812	1.47087	2.62171	0.000811153
Kojibiose	Sugars	1.10732	1.45352	0.919864	1.16581	1.16163	2.37799	3.76266	3.42873	3.52927	3.27466	2.81903	0.000643516
L-Galactose	Sugars	0.742508	0.845428	0.641157	0.901412	0.782626	1.43529	1.76302	1.62504	2.42663	1.8125	2.31591	0.00362151
L-Gulose	Sugars	0.0638298	0.0470165	0.0323065	0.142649	0.0714506	0.259952	0.226083	0.221738	0.210826	0.22965	3.21411	0.00104593
Melibiose	Sugars	16.2474	18.7135	12.3214	16.5871	15.9673	31.1763	49.1669	44.0569	44.6882	42.2721	2.64741	0.000670091
myo-Inositol	Sugars	0.00768791	0.0030074	0.00537509	0.0047643	0.00520867	0.0132555	0.0139118	0.0151371	0.0191657	0.0153675	2.95037	0.000815457
Neotrehalose	Sugars	0.00154207	0.0128844	0.00357726	0.0109129	0.00722916	0.0136606	0.0241876	0.0226345	0.0452689	0.0264379	3.65712	0.0378281
Nerolidol 3-O-[a-L-Rhamnopyranosyl-(1->4)-a-L-rhamnopyranosyl-(1->2)-b-D-glucopyranoside]	Sugars	0.00618569	0.00969492	0.0043691	0.00512918	0.00634472	0.00843558	0.0146388	0.0121638	0.0191899	0.013607	2.14462	0.0290215
Sucrose	Sugars	0.070174	0.0394574	0.0394413	0.0593738	0.0521116	0.0969062	0.158758	0.152708	0.0913328	0.124926	2.39728	0.00953468
1H-Indole-3-carboxaldehyde	Phytohormone	0.119296	0.158578	0.208941	0.148964	0.158945	0.663583	0.349808	0.527525	0.225489	0.441601	2.77833	0.0282279
3-Methylindole	Phytohormone	0.0345531	0.0502841	0.068069	0.0445435	0.0493625	0.21191	0.108377	0.151166	0.0641188	0.133893	2.71245	0.039623
Jasmonic acid	Phytohormone	0.00330333	0.00590559	0.00229156	0.00214899	0.00341237	0.0184336	0.0158627	0.00881995	0.0066004	0.0124292	3.64239	0.0221121
